# Supplementary material for: A Positive Control for Detection of Functional CD4 T Cells in PBMC: The CPI Pool
Source: PubMed Central journal article supplement (PMC5753071; doi:10.3390/cells6040047), 2017-12-07
Supplement: cells-06-00047-s001.pdf [file cells-06-00047-s001.pdf]

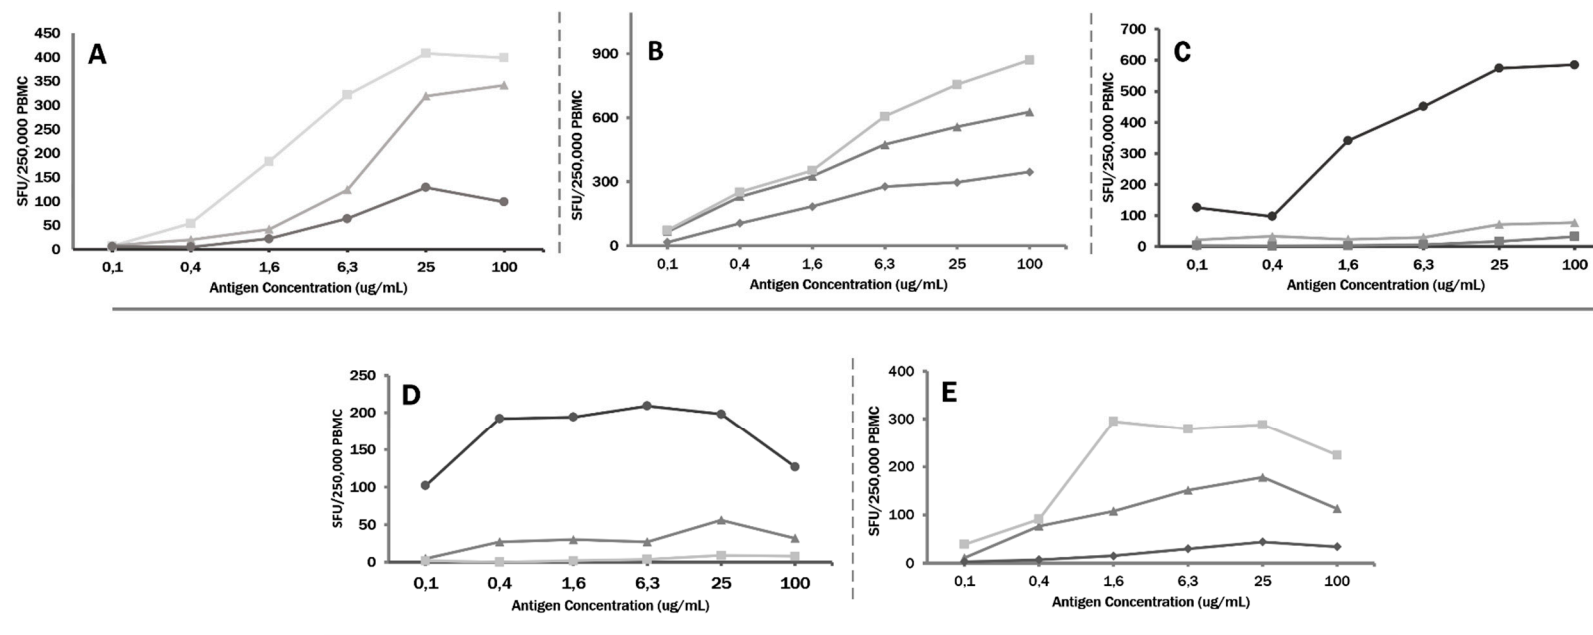

**Figure S1: Establishing optimal antigen concentrations for candidate antigens.** Antigen titrations are shown for influenza (Panel A), HCMV (Panel B) mumps (Panel C), varicella (Panel D), and parainfluenza (E). For each antigen PBMC of three donors were tested, distinguished by the symbols. The numbers of IFN- $\gamma$  SFU elicited (Y axis) are plotted against the antigen concentrations (X axis). The concentration selected as optimal are: 25  $\mu$ g/ml for influenza, 30  $\mu$ g/ml for HCMV, 50  $\mu$ g/ml for mumps, 12.5  $\mu$ g/ml for varicella, and 3.3  $\mu$ g/ml for parainfluenza.

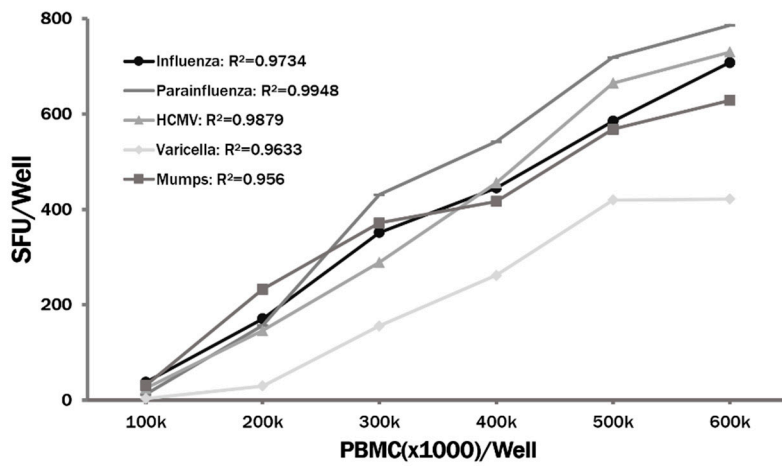

**Figure S2. Establishing the optimal PBMC number.** PBMC were plated in serial dilution in the number of cells specified on the X axis. The specified antigens were added at the optimal concentration established in Suppl. Fig 1. and the resulting number of IFN- $\gamma$  SFU per well were measured (Y axis). The data show a close to linear relationship between cell numbers and spot counts from 200,000 to 500,000 PBMC per well: the R<sup>2</sup> values for linearity are specified.

| Donor | Antigens |     |     |     |     |     |
|-------|----------|-----|-----|-----|-----|-----|
|       | I        | P   | C   | M   | V   | CEF |
| 1     | 39       | 44  | 90  | 6   | 7   | 49  |
| 2     | 207      | 355 | 55  | 244 | 135 | 45  |
| 3     | 112      | 143 | 447 | 134 | 56  | 248 |
| 4     | 175      | 260 | 100 | 30  | 37  | 123 |
| 5     | 85       | 115 | 5   | 19  | 3   | 3   |
| 6     | 355      | 504 | 94  | 276 | 88  | 331 |
| 7     | 24       | 31  | 2   | 7   | 6   | 1   |
| 8     | 382      | 453 | 600 | 344 | 272 | 234 |
| 9     | 5        | 4   | 170 | 48  | 4   | 1   |
| 10    | 600      | 600 | 600 | 130 | 106 | 47  |
| 11    | 99       | 170 | 15  | 39  | 11  | 1   |
| 12    | 176      | 177 | 214 | 69  | 13  | 146 |
| 13    | 250      | 600 | 600 | 167 | 171 | 198 |
| 14    | 100      | 154 | 86  | 127 | 64  | 125 |
| 15    | 206      | 600 | 600 | 201 | 85  | 174 |
| 16    | 152      | 173 | 170 | 166 | 176 | 227 |
| 17    | 154      | 270 | 510 | 1   | 4   | 114 |
| 18    | 350      | 600 | 272 | 14  | 178 | 41  |
| 19    | 16       | 48  | 161 | 2   | 76  | 159 |
| 20    | 12       | 30  | 9   | 4   | 11  | 3   |
| 21    | 46       | 172 | 63  | 3   | 34  | 26  |
| 22    | 1        | 16  | 46  | 1   | 5   | 64  |
| 23    | 300      | 311 | 398 | 4   | 58  | 173 |
| 24    | 36       | 30  | 351 | 1   | 5   | 106 |
| 25    | 38       | 279 | 24  | 15  | 12  | 7   |
| 26    | 295      | 467 | 600 | 28  | 39  | 600 |
| 27    | 99       | 102 | 379 | 5   | 21  | 78  |
| 28    | 19       | 8   | 398 | 1   | 2   | 208 |
| 29    | 45       | 97  | 15  | 2   | 16  | 396 |
| 30    | 376      | 522 | 72  | 13  | 51  | 6   |
| 31    | 22       | 110 | 92  | 17  | 19  | 116 |
| 32    | 253      | 182 | 22  | 10  | 21  | 278 |
| 33    | 119      | 157 | 17  | 24  | 55  | 164 |
| 34    | 354      | 567 | 130 | 179 | 111 | 48  |
| 35    | 219      | 111 | 600 | 22  | 65  | 162 |
| 36    | 25       | 72  | 15  | 75  | 18  | 4   |
| 37    | 115      | 148 | 2   | 8   | 33  | 38  |
| 38    | 332      | 376 | 109 | 215 | 200 | 54  |
| 39    | 167      | 372 | 600 | 147 | 18  | 600 |
| 40    | 127      | 221 | 216 | 42  | 67  | 20  |
| 41    | 122      | 178 | 174 | 10  | 9   | 92  |
| 42    | 98       | 306 | 11  | 10  | 1   | 92  |
| 43    | 117      | 169 | 116 | 16  | 32  | 100 |
| 44    | 66       | 180 | 163 | 3   | 1   | 177 |
| 45    | 94       | 257 | 165 | 42  | 103 | 142 |
| 46    | 94       | 272 | 152 | 150 | 57  | 3   |
| 47    | 104      | 122 | 3   | 7   | 15  | 12  |
| 48    | 16       | 55  | 76  | 6   | 4   | 189 |
| 49    | 69       | 18  | 29  | 15  | 26  | 330 |
| 50    | 54       | 43  | 274 | 29  | 8   | 73  |
| 51    | 71       | 44  | 337 | 7   | 9   | 83  |
| 52    | 83       | 37  | 3   | 5   | 13  | 71  |
| 53    | 162      | 246 | 177 | 69  | 22  | 51  |
| 54    | 309      | 144 | 122 | 17  | 24  | 266 |
| 55    | 143      | 369 | 475 | 115 | 89  | 68  |
| 56    | 14       | 5   | 73  | 5   | 2   | 262 |
| 57    | 53       | 35  | 50  | 29  | 17  | 190 |
| 58    | 31       | 31  | 44  | 27  | 8   | 3   |
| 59    | 445      | 402 | 408 | 516 | 478 | 291 |
| 60    | 266      | 31  | 152 | 41  | 35  | 118 |
| 61    | 8        | 12  | 24  | 12  | 23  | 10  |
| 62    | 23       | 8   | 59  | 8   | 4   | 101 |
| 63    | 113      | 34  | 3   | 18  | 4   | 40  |
| 64    | 85       | 96  | 145 | 14  | 22  | 268 |
| 65    | 29       | 44  | 4   | 44  | 17  | 187 |
| 66    | 92       | 145 | 33  | 120 | 36  | 48  |
| 67    | 22       | 22  | 525 | 156 | 25  | 4   |
| 68    | 45       | 167 | 243 | 172 | 8   | 104 |
| 69    | 223      | 117 | 84  | 113 | 35  | 570 |
| 70    | 22       | 4   | 0   | 14  | 0   | 4   |
| 71    | 14       | 22  | 1   | 23  | 1   | 24  |
| 72    | 77       | 9   | 0   | 38  | 2   | 2   |
| 73    | 25       | 69  | 185 | 74  | 29  | 2   |
| 74    | 14       | 12  | 24  | 42  | 10  | 2   |
| 75    | 395      | 561 | 277 | 463 | 53  | 235 |
| 76    | 93       | 94  | 174 | 277 | 71  | 309 |
| 77    | 58       | 24  | 90  | 40  | 24  | 8   |
| 78    | 52       | 39  | 38  | 87  | 24  | 128 |
| 79    | 65       | 11  | 2   | 39  | 4   | 4   |
| 80    | 307      | 138 | 331 | 345 | 51  | 303 |
| 81    | 305      | 66  | 13  | 249 | 10  | 85  |
| 82    | 177      | 65  | 2   | 91  | 9   | 283 |
| 83    | 5        | 13  | 86  | 59  | 5   | 13  |
| 84    | 169      | 50  | 17  | 361 | 28  | 85  |
| 85    | 179      | 106 | 447 | 650 | 51  | 52  |
| 86    | 224      | 47  | 6   | 127 | 20  | 261 |
| 87    | 74       | 27  | 1   | 50  | 7   | 4   |
| 88    | 9        | 40  | 3   | 65  | 3   | 105 |
| 89    | 452      | 406 | 9   | 222 | 27  | 20  |
| 90    | 33       | 31  | 276 | 214 | 22  | 12  |
| 91    | 70       | 140 | 8   | 600 | 8   | 8   |
| 92    | 74       | 427 | 762 | 152 | 29  | 5   |
| 93    | 325      | 452 | 17  | 600 | 25  | 85  |
| 94    | 114      | 34  | 136 | 135 | 19  | 336 |
| 95    | 166      | 124 | 473 | 174 | 15  | 401 |
| 96    | 42       | 8   | 111 | 72  | 5   | 600 |
| 97    | 81       | 298 | 67  | 217 | 97  | 17  |
| 98    | 162      | 71  | 223 | 185 | 14  | 0   |
| 99    | 38       | 50  | 12  | 150 | 15  | 12  |
| 100   | 11       | 27  | 19  | 53  | 10  | 0   |
| %     | 77       | 77  | 73  | 65  | 52  | 69  |

**Table S1. Test results for 100 donors screened for reactivity to the individual antigens.**

“I” stands for influenza, “P” for parainfluenza, “C” for human cytomegalovirus, “M” for mumps virus, and “V” for varicella virus. These antigens and the CEF peptide pool were tested in an IFN- $\gamma$  ELISPOT assay on the specified donors, with 250,000 PBMC per well. The results are shown as SFU per well highlighting negative responses in yellow.
